# Supplementary material for: Ethanol gas sensor based on a self-supporting hierarchical SnO2 nanorods array
Source: Royal Society of Chemistry journal article supplement (doi:10.1039/c4ce02367f), 2015-01-01
Supplement: c4ce02367f1.pdf [file c4ce02367f1.pdf]

### Supporting information

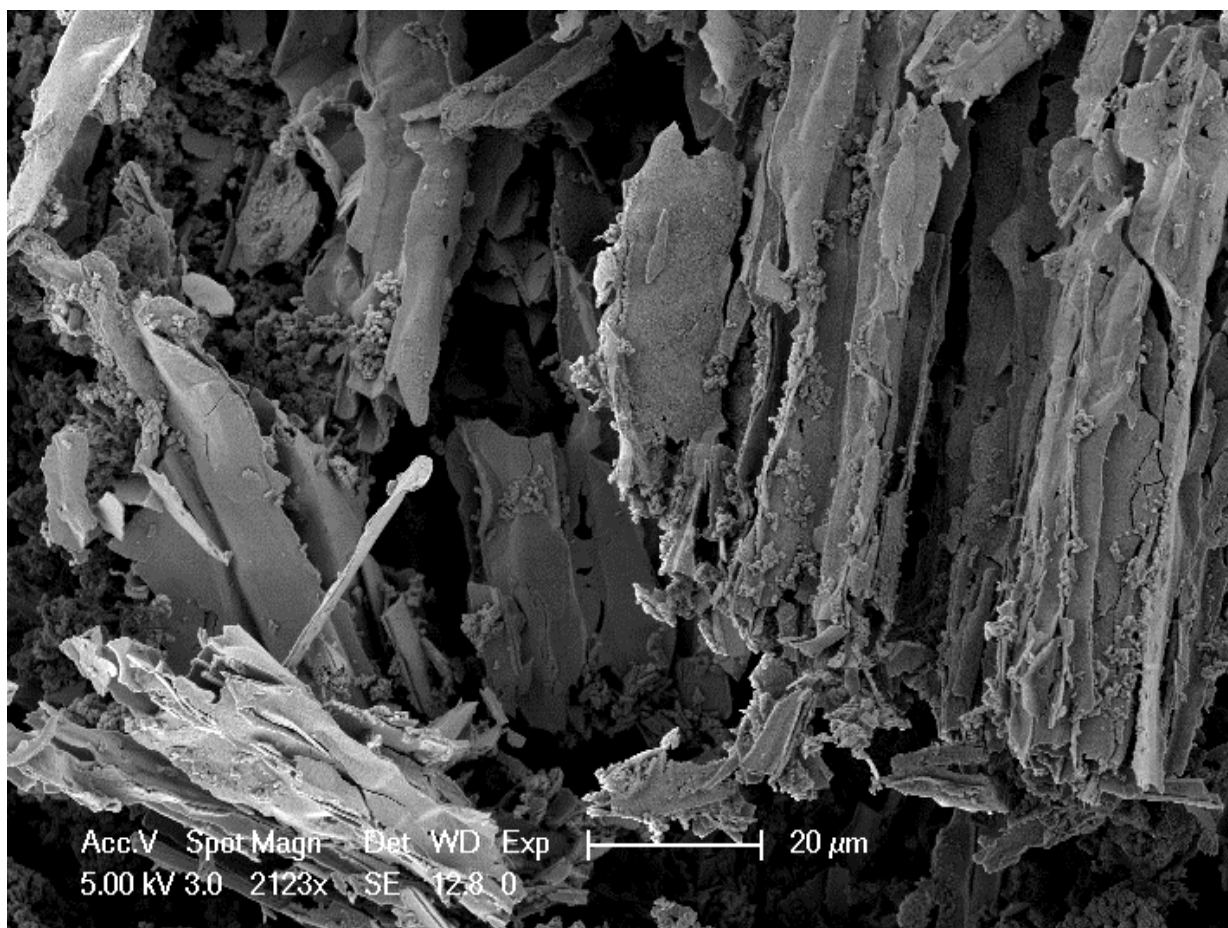

**Fig. S1** The self-supporting 3D hierarchical SnO<sub>2</sub> nanorods array structures synthesized by solvothermal are high yield and repeatable.
